# Supplementary material for: Multifunctional antibiotics-free hydrogel dressings with self-regulated nitric oxide-releasing kinetics for improving open wound healing
Source: Royal Society of Chemistry journal article supplement (doi:10.1039/d2tb02671f), 2023-01-01
Supplement: d2tb02671f1.pdf [file d2tb02671f1.pdf]

**Supporting information**

**Multifunctional antibiotics-free hydrogel dressings with self-regulated  
nitric oxide-releasing kinetics for improving open wound healing**

Yuan Liu<sup>#a</sup>, Lu Tan<sup>#a</sup>, Yan Huang<sup>a</sup>, Maohua Chen<sup>a</sup>, Menghuan Li<sup>b</sup>, Kaiyong Cai<sup>\*a</sup>, Zhong Luo<sup>\*b</sup>, Yan Hu<sup>\*a</sup>

<sup>a</sup>Key Laboratory of Biorheological Science and Technology, Ministry of Education, College of Bioengineering,  
Chongqing University, Chongqing 400044, China

<sup>b</sup>School of Life Science, Chongqing University, Chongqing 400044, China

<sup>#</sup>Authors contributed equally to the work

**Table S1** The precursor ratios of the hydrogels.

| Sample  | GelMA ( $\mu\text{L}$ ) | Chi-SNO ( $\mu\text{L}$ ) | Chi ( $\mu\text{L}$ ) |
|---------|-------------------------|---------------------------|-----------------------|
| GC      | 300                     | 0                         | 50                    |
| GCNO50  | 300                     | 50                        | 0                     |
| GCNO100 | 300                     | 100                       | 0                     |
| GCNO200 | 300                     | 200                       | 0                     |

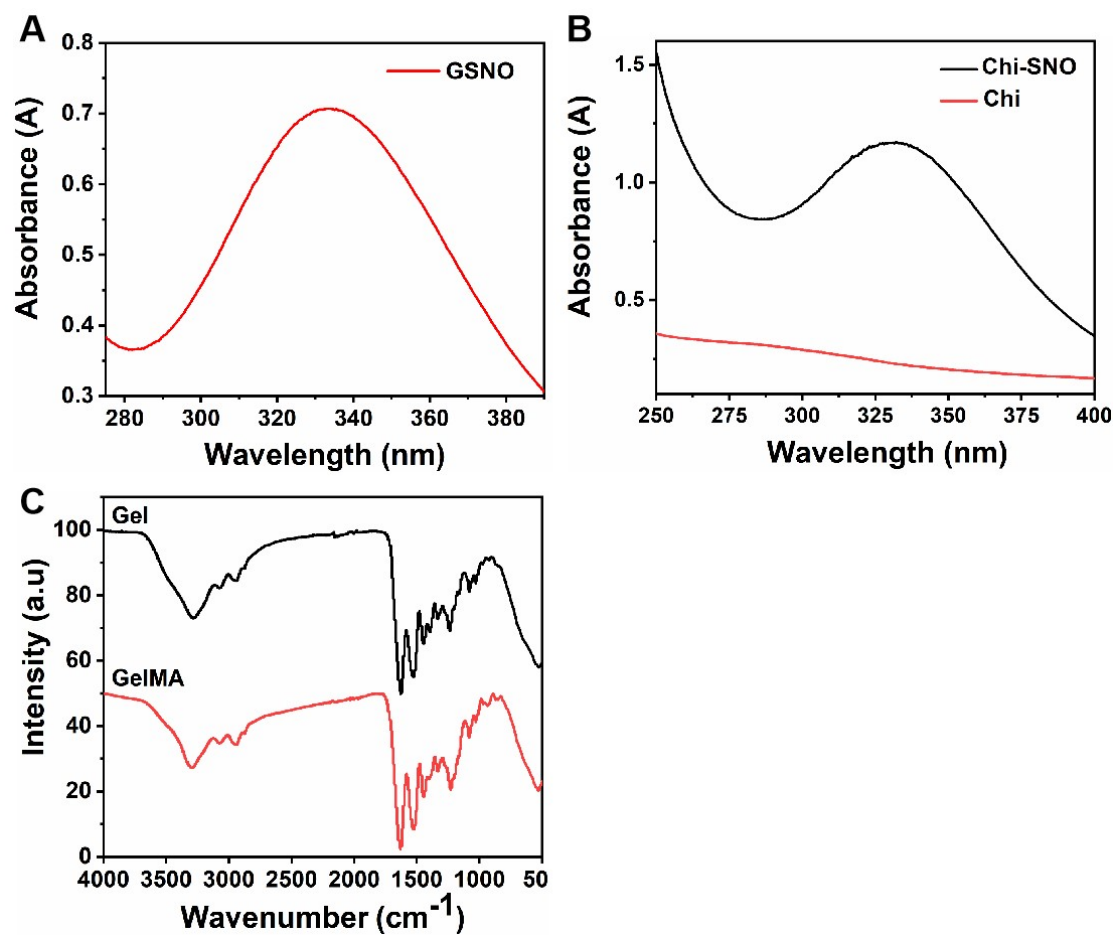

Fig. S1 (A) Characteristic UV absorption peak of GSNO. (B) Characteristic UV absorption peak of Chi and Chi-SNO. (C) FT-IR of Gel and GelMA.

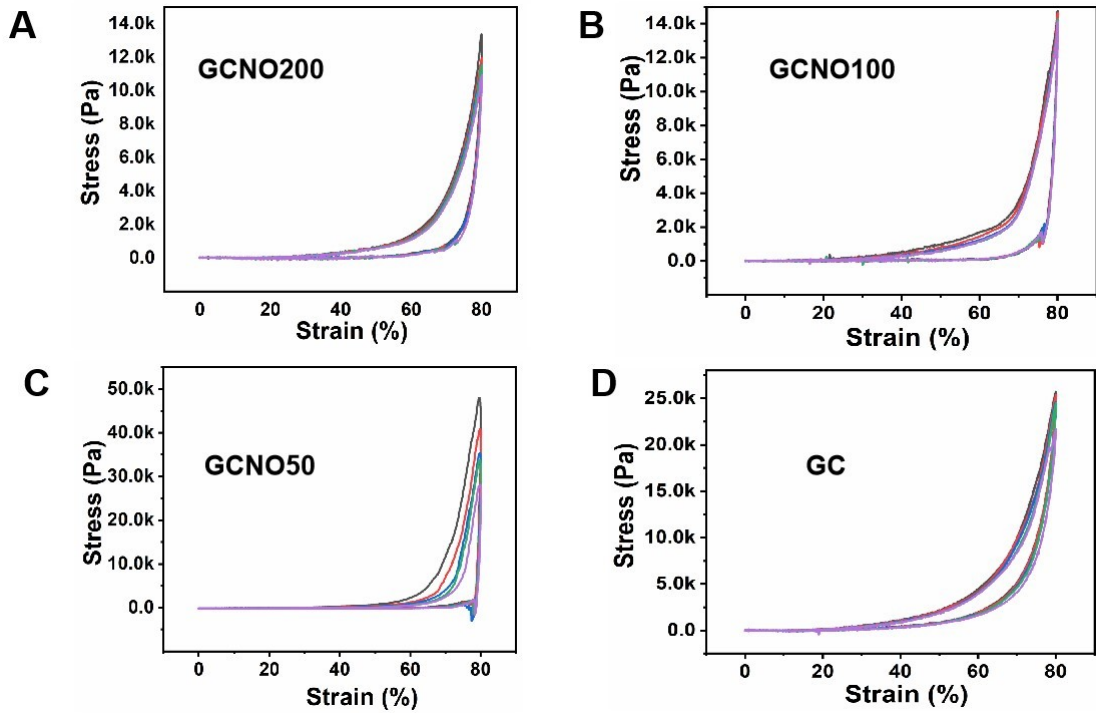

Fig. S2 (A, B, C, D) Cyclic compression stress-strain curve of different samples.

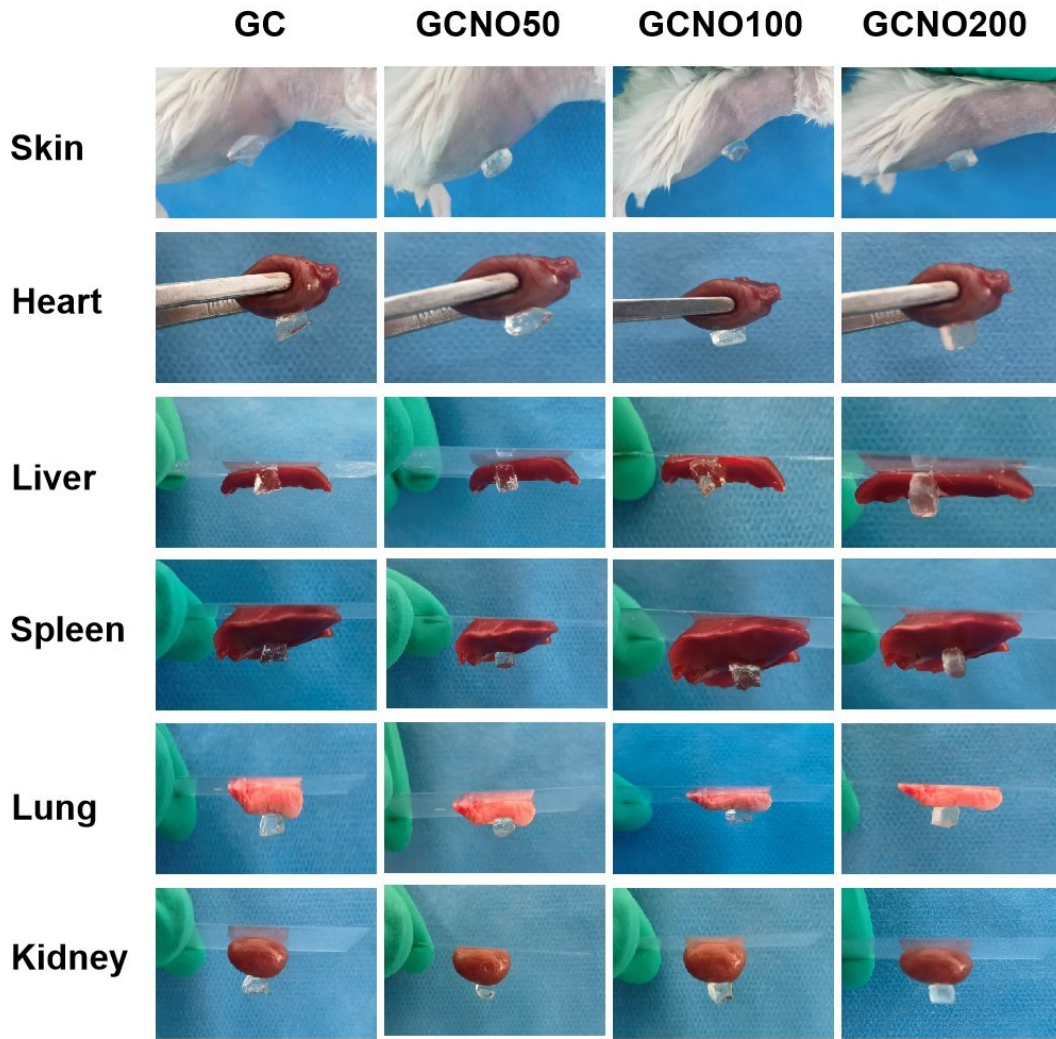

Fig. S3 Adhesion properties of hydrogels on major organs and skin.

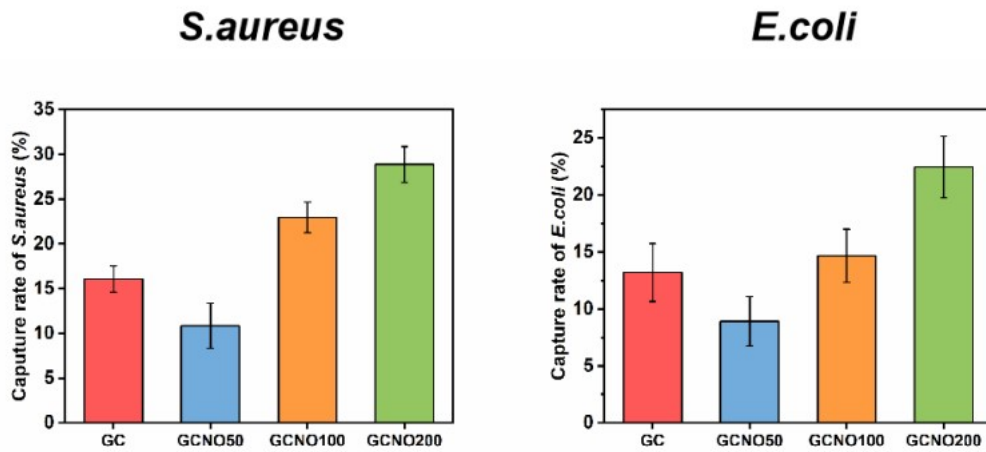

Fig. S4 Capture of *S. aureus* and *E. coli* with different treatment.

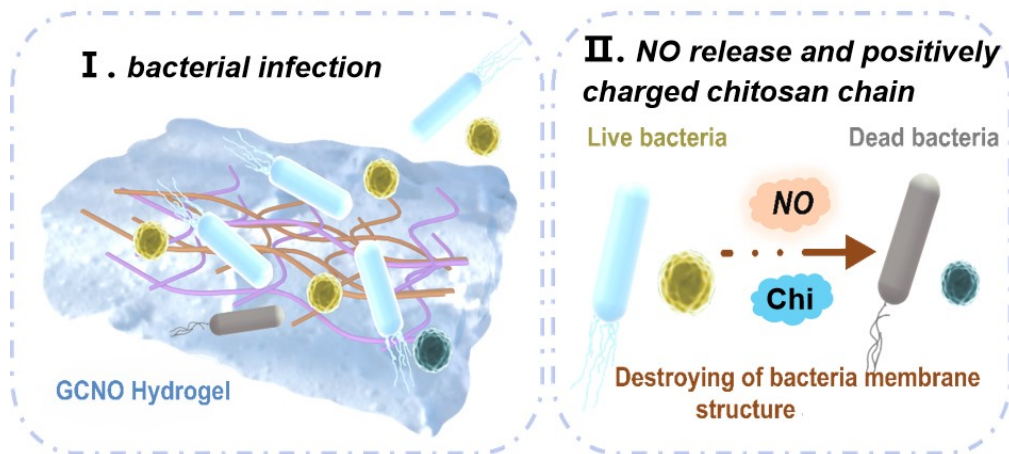

Fig. S5 Diagram of sterilization mechanism.

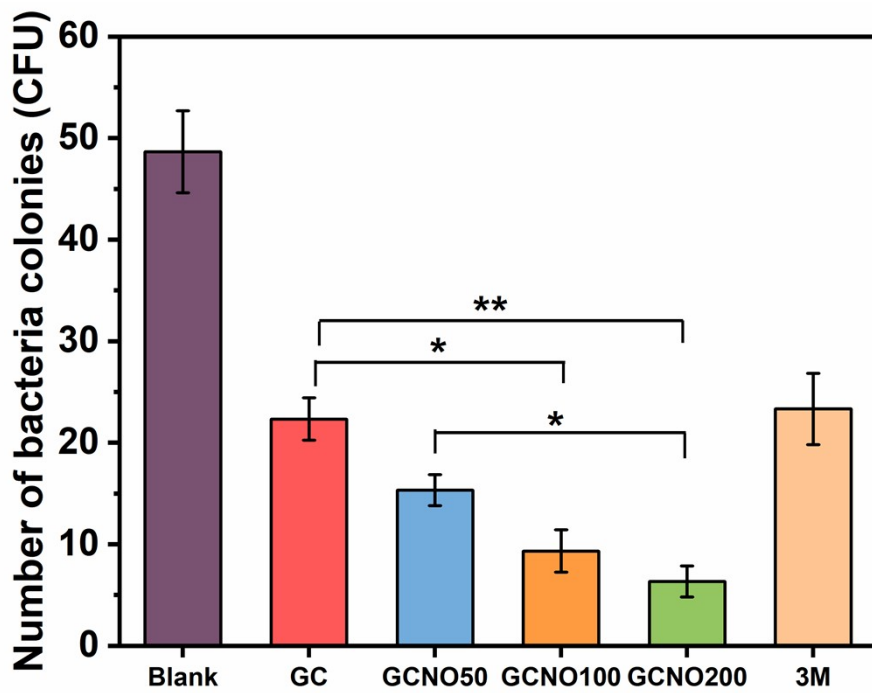

Fig. S6 The number of bacteria colonies from the animal wounds with different treatment.
